# Supplementary material for: COVID-19 Vaccination is Associated with Decreasing Cases, Hospitalizations, and Deaths Across Age Groups and Variants over 9 months in Switzerland
Source: bioRxiv or medRxiv preprint supplement (doi:10.1101/2022.02.03.22270396), 2022-02-03

### Relationships between Vaccination and Hospitalizations by Age Group and Dominant Variant

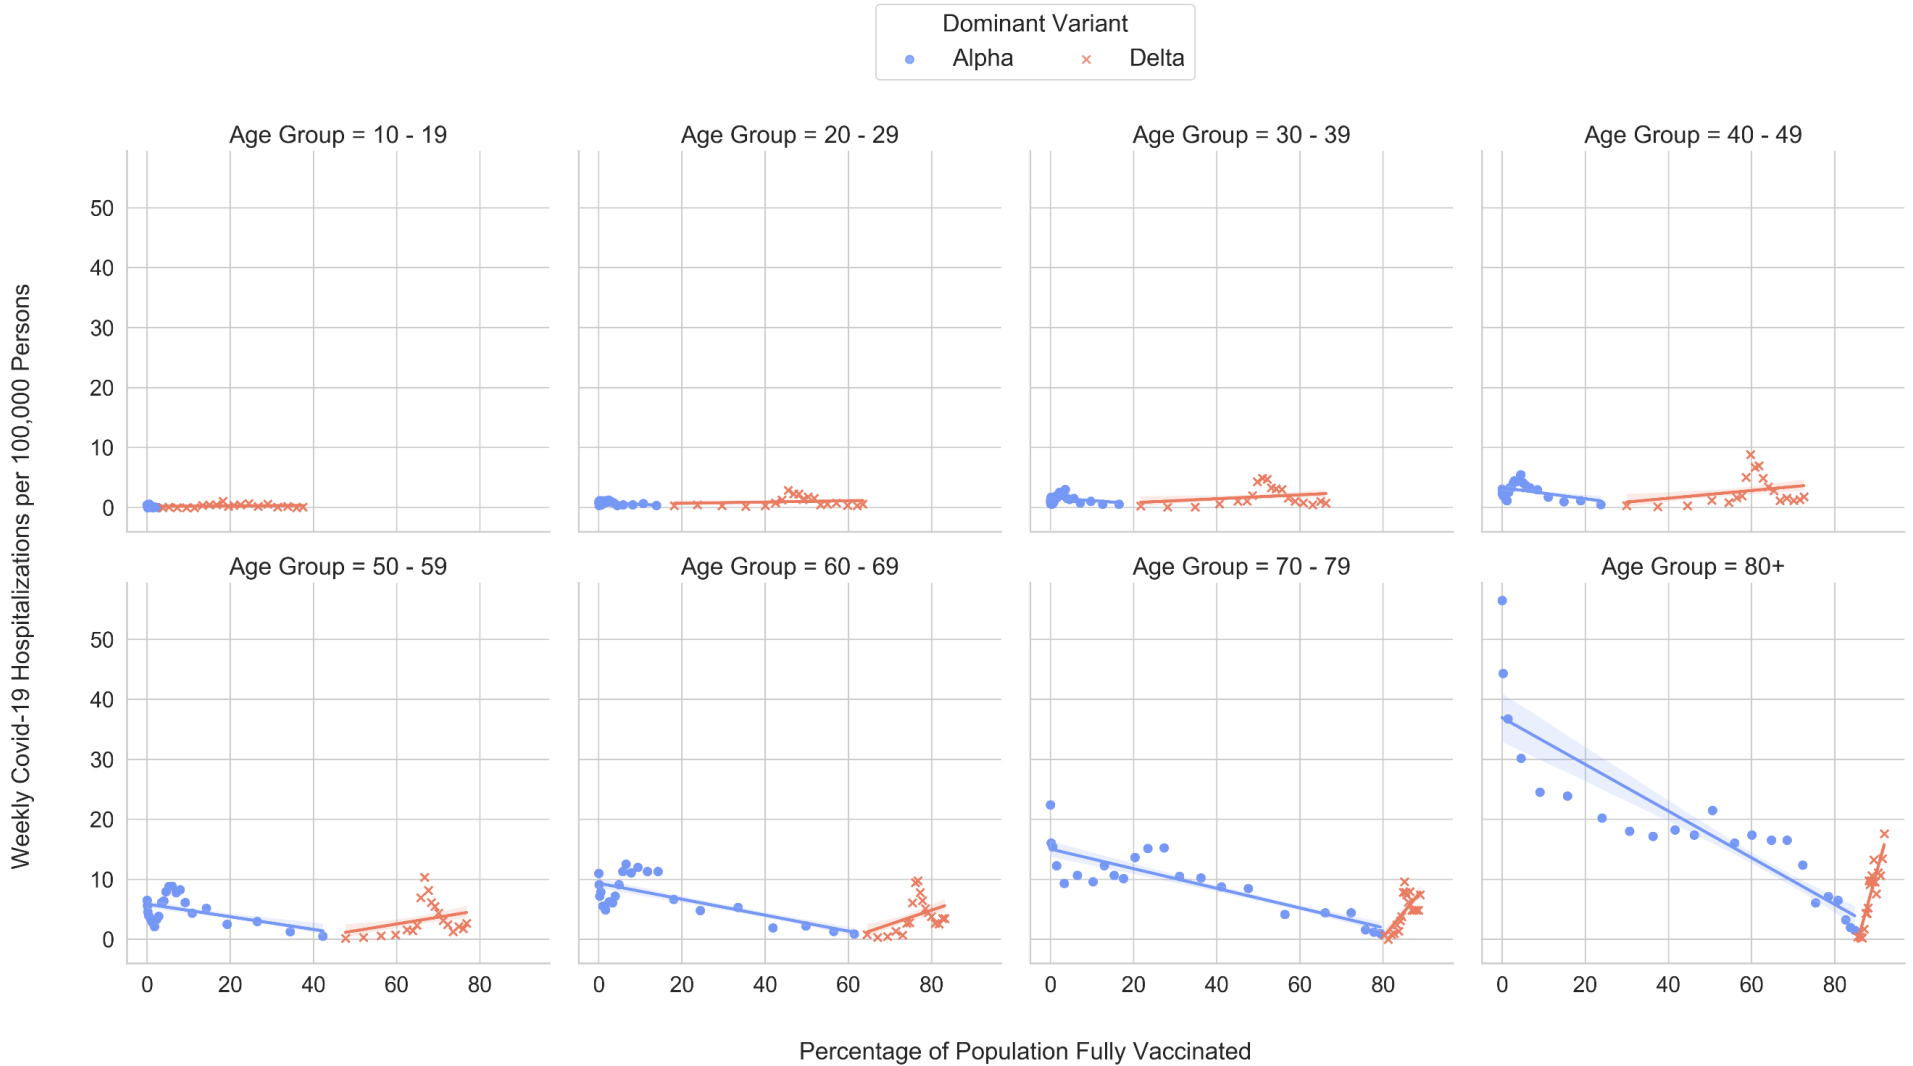

# Relationships between Vaccination and Deaths by Age Group and Dominant Variant

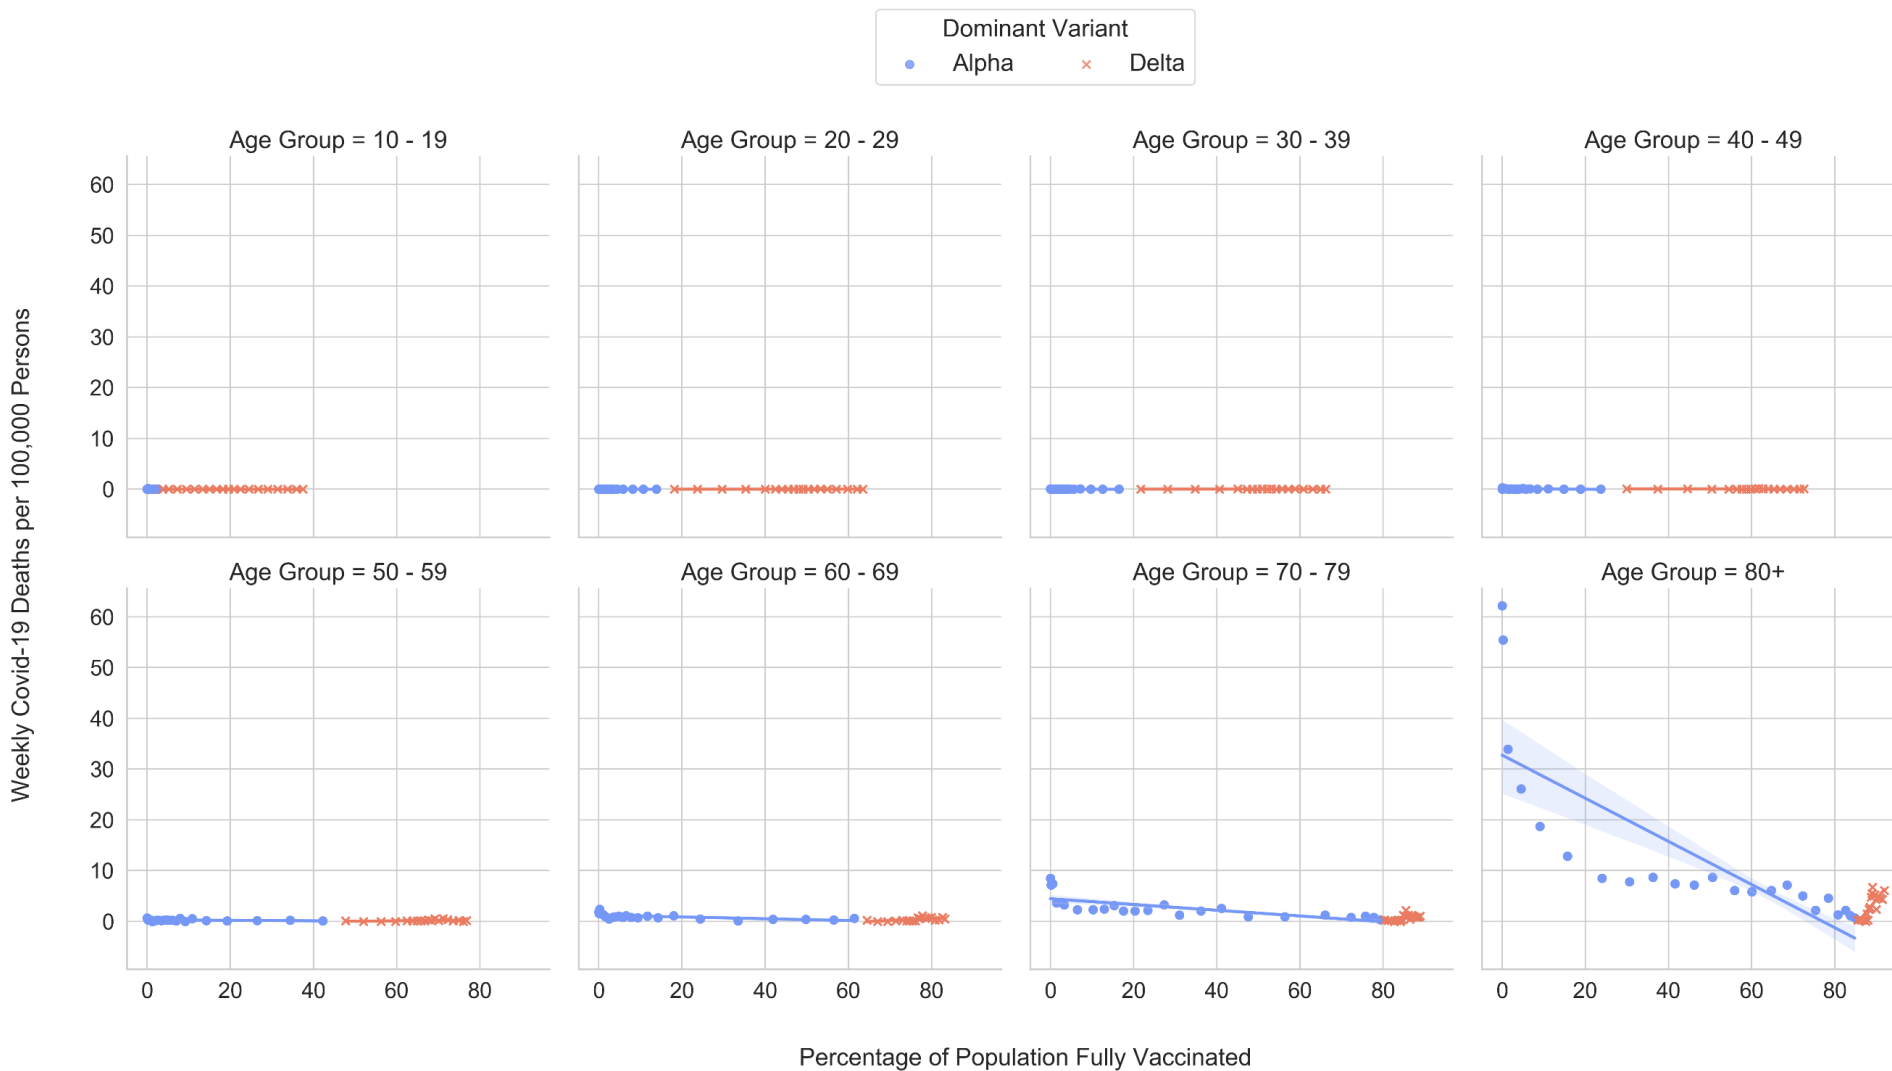

Supplement: Supplementary file [file media-1.pdf]
